# Supplementary material
Source: ML conference proceedings conference paper supplement (https://proceedings.mlr.press/v33/honda14.html)
Supplement: Supplementary file [file honda14-supp.pdf]

## Optimality of Thompson Sampling for Gaussian Bandits Depends on Priors: Supplementary Material

We prove Lemmas 3, 4 and 9 in this supplementary material.

Before the proof of these lemmas we give a simple inequality to evaluate the ratio of gamma functions to evaluate densities of normal, chi-squared and  $t$ -distributions.

**Lemma 10.** For  $z \geq 1/2$

$$e^{-2/3} \leq \frac{\Gamma(z + \frac{1}{2})}{\Gamma(z)} \leq e^{1/6} \sqrt{z}.$$

*Proof of Lemma 10.* Since

$$\sqrt{2\pi} z^{z-1/2} e^{-z} \leq \Gamma(z) \leq \sqrt{2\pi} e^{1/6} z^{z-1/2} e^{-z}$$

for  $z \geq 1/2$  from Stirling's formula (Olver et al., 2010, Sect. 5.6(i)), we have

$$\begin{aligned} \frac{\Gamma(z + \frac{1}{2})}{\Gamma(z)} &\geq e^{-2/3} \sqrt{z} \left(1 + \frac{1}{2z}\right)^z \\ &\geq e^{-2/3} \sqrt{1/2} \left(1 + \frac{1}{2 \cdot 1/2}\right)^{1/2} \\ &= e^{-2/3}. \end{aligned}$$

Similarly we have

$$\begin{aligned} \frac{\Gamma(z + \frac{1}{2})}{\Gamma(z)} &\leq e^{-1/3} \sqrt{z} \left(1 + \frac{1}{2z}\right)^z \\ &\leq e^{1/6} \sqrt{z}, \end{aligned}$$

which completes the proof.  $\square$

We prove Lemma 3 based on Cramér's theorem given below.

**Proposition 11** (Dembo & Zeitouni, 1998, Ex. 2.2.38). Let  $Z_1, Z_2, \dots$  be i.i.d. random variables on  $\mathbb{R}^d$ . Then, for  $\bar{Z} = n^{-1} \sum_{m=1}^n Z_m \in \mathbb{R}^d$  and any convex set  $C \in \mathbb{R}^d$ ,

$$\Pr[\bar{Z} \in C] \leq \exp\left(-n \inf_{z \in C} \Lambda^*(z)\right),$$

where

$$\Lambda^*(z) = \sup_{\lambda \in \mathbb{R}^d} \{\lambda \cdot z - \log \mathbb{E}[e^{\lambda \cdot Z_1}]\}.$$

*Proof of Lemma 3.* Eq. (8) is straightforward from Cramér's theorem with  $Z_m := X_{i,m}$  (see also e.g. Dembo & Zeitouni, 1998, Ex. 2.2.23).

Now we show (9). Let  $Z_m = (Z_m^{(1)}, Z_m^{(2)}) := (X_{i,m}, X_{i,m}^2) \in \mathbb{R}^2$ . Then it is easy to see that the Fenchel-Legendre transform of the cumulant generating function of  $Z_i$  is given by

$$\Lambda^*(z^{(1)}, z^{(2)}) = \begin{cases} h\left(\frac{z^{(2)} - (z^{(1)})^2}{\sigma_i^2}\right) + \frac{(z^{(1)} - \mu_i)^2}{2\sigma_i^2}, & z^{(2)} > (z^{(1)})^2, \\ +\infty, & z^{(2)} \leq (z^{(1)})^2. \end{cases}$$

Eq. (9) follows from

$$\begin{aligned} &\Pr[S_{i,n} \geq n\sigma^2] \\ &= \Pr[\bar{Z}^{(2)} - (\bar{Z}^{(1)})^2 \geq \sigma^2] \\ &\leq \exp\left(-n \inf_{(z^{(1)}, z^{(2)}) : z^{(2)} - (z^{(1)})^2 \geq \sigma^2} \Lambda^*(z^{(1)}, z^{(2)})\right) \\ &\leq \exp\left(-nh\left(\frac{\sigma^2}{\sigma_i^2}\right)\right), \end{aligned}$$

where the first and the second inequalities follow because  $\{(z^{(1)}, z^{(2)}) : z^{(2)} - (z^{(1)})^2 \geq \sigma^2\}$  is a convex set and  $h(x)$  is increasing in  $x \geq 1$ , respectively.  $\square$

Next we prove Lemma 4 based on Lemma 10.

*Proof of Lemma 4.* Letting

$$\begin{aligned} \tilde{A} &= \frac{\Gamma(\frac{n}{2} + \alpha)}{\sqrt{\pi(n + 2\alpha - 1)} \Gamma(\frac{n-1}{2} + \alpha)}, \\ x_0 &= \sqrt{\frac{n(n + 2\alpha - 1)}{S_{i,n}}} (\mu - \bar{x}_{i,n}), \end{aligned}$$

we can express  $p_n(\mu|\hat{\theta}_{i,n})$  from (4) and (5) as

$$p_n(\mu|\hat{\theta}_{i,n}) = \tilde{A} \int_{x_0}^{\infty} \left(1 + \frac{x^2}{n + 2\alpha - 1}\right)^{-\frac{n}{2} - \alpha} dx. \quad (25)$$

This integral is bounded from above by

$$\begin{aligned}
 p_n(\mu|\hat{\theta}_{i,n}) &= \tilde{A} \int_{x_0}^{\infty} \frac{1}{x} \cdot x \left(1 + \frac{x^2}{n+2\alpha-1}\right)^{-\frac{n}{2}-\alpha} dx \\
 &= \tilde{A} \left[ \frac{1}{x} \cdot \frac{\frac{n-1}{2} + \alpha}{\frac{n-2}{2} + \alpha} \left(1 + \frac{x^2}{n+2\alpha-1}\right)^{-\frac{n-2}{2}-\alpha} \right]_{x_0}^{\infty} \\
 &\quad - \tilde{A} \int_{x_0}^{\infty} \frac{2}{x^2} \frac{\frac{n-1}{2} + \alpha}{\frac{n-2}{2} + \alpha} \left(1 + \frac{x^2}{n+2\alpha-1}\right)^{-\frac{n-2}{2}-\alpha} dx \\
 &\leq \frac{\tilde{A}}{x_0} \frac{\frac{n-1}{2} + \alpha}{\frac{n-2}{2} + \alpha} \left(1 + \frac{x_0^2}{n+2\alpha-1}\right)^{-\frac{n-2}{2}-\alpha}.
 \end{aligned}$$

From Lemma 10

$$\begin{aligned}
 \frac{\tilde{A}}{x_0} \frac{\frac{n-1}{2} + \alpha}{\frac{n-2}{2} + \alpha} &= \frac{\Gamma(\frac{n-2}{2} + \alpha)}{2\sqrt{\pi n} \Gamma(\frac{n-1}{2} + \alpha)} \frac{\sqrt{S_{i,n}}}{\mu - \bar{x}_{i,n}} \\
 &\leq \frac{1}{2\sqrt{\pi n} e^{-2/3}} \frac{\sqrt{S_{i,n}}}{\mu - \bar{x}_{i,n}} \\
 &\leq \frac{1}{\sqrt{n}} \frac{\sqrt{S_{i,n}}}{\mu - \bar{x}_{i,n}}
 \end{aligned}$$

and we obtain (10).

On the other hand, the integral (25) is bounded from below by

$$\begin{aligned}
 p_n(\mu|\hat{\theta}_{i,n}) &= \tilde{A} \int_{x_0}^{\infty} \left(1 + \frac{x^2}{n+2\alpha-1}\right)^{\frac{1}{2}} \\
 &\quad \cdot \left(1 + \frac{x^2}{n+2\alpha-1}\right)^{-\frac{n+1}{2}-\alpha} dx \\
 &\geq \tilde{A} \int_{x_0}^{\infty} \frac{x}{\sqrt{n+2\alpha-1}} \left(1 + \frac{x^2}{n+2\alpha-1}\right)^{-\frac{n+1}{2}-\alpha} dx \\
 &\quad \text{(by } \sqrt{1+u^2} \geq u) \\
 &= \frac{\tilde{A}}{\sqrt{n+2\alpha-1}} \left(1 + \frac{x_0^2}{n+2\alpha-1}\right)^{-\frac{n-1}{2}-\alpha}.
 \end{aligned}$$

From Lemma 10

$$\begin{aligned}
 \frac{\tilde{A}}{\sqrt{n+2\alpha-1}} &= \frac{\Gamma(\frac{n}{2} + \alpha)}{2\sqrt{\pi} \Gamma(\frac{n+1}{2} + \alpha)} \\
 &\geq \frac{1}{2e^{1/6} \sqrt{\pi(\frac{n}{2} + \alpha)}}
 \end{aligned}$$

and we obtain (11).  $\square$

Finally we prove Lemmas 8 and 9 on the regret bound of Thompson sampling.

*Proof of Lemma 8.* Let  $n_i > 0$  be arbitrary. Then

$$\begin{aligned}
 &\sum_{t=K\bar{n}+1}^T \mathbb{1}[J(t) = i, \mathcal{A}(t), \mathcal{B}_i(t)] \\
 &\leq \sum_{t=K\bar{n}+1}^T \mathbb{1}[\tilde{\mu}_i(t) \geq -\epsilon, \mathcal{B}_i(t)] \\
 &\leq n_i + \sum_{t=K\bar{n}+1}^T \mathbb{1}[\tilde{\mu}_i(t) \geq -\epsilon, \mathcal{B}_i(t), N_i(t) \geq n_i].
 \end{aligned} \tag{26}$$

Under the condition  $\{\mathcal{B}_i(t), N_i(t) = n\}$ , the probability of the event  $\tilde{\mu}_i(t) \geq -\epsilon = \mu^* - \epsilon$  is bounded from Lemma 4 as

$$\begin{aligned}
 p_n(-\epsilon|\hat{\theta}_{i,n}) &\leq \frac{\sqrt{\sigma_i^2 + \epsilon}}{\Delta_i - 2\epsilon} \left(1 + \frac{(\Delta_i - 2\epsilon)^2}{\sigma_i^2 + \epsilon}\right)^{-\frac{n}{2}-\alpha+1} \\
 &= \frac{\sqrt{\sigma_i^2 + \epsilon}}{\Delta_i - 2\epsilon} e^{-(n+2\alpha-2)D_{\text{inf}}(\Delta_i - 2\epsilon, \sigma_i^2 + \epsilon)}.
 \end{aligned}$$

Therefore the expectation of (26) is bounded as

$$\begin{aligned}
 &\mathbb{E} \left[ \sum_{t=K\bar{n}+1}^T \mathbb{1}[J(t) = i, \mathcal{A}(t), \mathcal{B}_i(t)] \right] \\
 &\leq n_i + \sum_{t=K\bar{n}+1}^T \Pr[\tilde{\mu}_i(t) \geq -\epsilon, \mathcal{B}_i(t), N_i(t) \geq n_i] \\
 &\leq n_i + T \frac{\sqrt{\sigma_i^2 + \epsilon}}{\Delta_i - 2\epsilon} e^{-(n_i+2\alpha-2)D_{\text{inf}}(\Delta_i - 2\epsilon, \sigma_i^2 + \epsilon)}
 \end{aligned}$$

and we complete the proof by letting  $n_i = (\log T)/D_{\text{inf}}(\Delta_i - 2\epsilon, \sigma_i^2 + \epsilon) + 2 - 2\alpha$ .  $\square$

*Proof of Lemma 9.* First we have

$$\begin{aligned}
 &\sum_{t=K\bar{n}+1}^T \mathbb{1}[J(t) = i, \mathcal{B}_i^c(t)] \\
 &= \sum_{n=\bar{n}}^T \mathbb{1} \left[ \bigcup_{t=K\bar{n}+1}^T \{J(t) = i, \mathcal{B}_i^c(t), N_i(t) = n\} \right] \\
 &\leq \sum_{n=\bar{n}}^T \mathbb{1}[\bar{x}_{i,n} \geq \mu_i + \delta \text{ or } S_{i,n} \geq n(\sigma_i^2 + \epsilon)].
 \end{aligned}$$

Therefore, from Lemma 3,

$$\begin{aligned}
 &\mathbb{E} \left[ \sum_{t=K\bar{n}+1}^T \mathbb{1}[J(t) = i, \mathcal{B}_i^c(t)] \right] \\
 &\leq \sum_{n=\bar{n}}^T \left( e^{-n\frac{\epsilon^2}{2\sigma_i^2}} + e^{-nh\left(1+\frac{\epsilon}{\sigma_i^2}\right)} \right) \\
 &\leq \frac{1}{1 - e^{-\frac{\epsilon^2}{2\sigma_i^2}}} + \frac{1}{1 - e^{-h\left(1+\frac{\epsilon}{\sigma_i^2}\right)}} \\
 &= O(\epsilon^{-2}) + O(\epsilon^{-2}) = O(\epsilon^{-2}).
 \end{aligned} \tag{26}$$

$\square$
